# Supplementary material for: A Causal Relationship between Vitamin C Intake with Hyperglycemia and Metabolic Syndrome Risk: A Two-Sample Mendelian Randomization Study
Source: MDPI journal article supplement (doi:10.3390/antiox11050857), 2022-04-27
Supplement: s1 [file s1]

**Supplemental Table S1.** Genetic variants associated with V-C intake in city cohort and their magnitude in city hospital-based cohort and their association with fasting serum glucose concentrations at a fasting state in Ansan/Ansung+rural cohort

| CHR | SNP          | EA | NA | Beta for V-C intake | SE for V-C intake | p-value  | Beta for fasting serum glucose | SE for fasting serum glucose | p-value | Gene name       |
|-----|--------------|----|----|---------------------|-------------------|----------|--------------------------------|------------------------------|---------|-----------------|
| 1   | rs74682528   | C  | T  | 0.0569              | 0.0320            | 4.19E-05 | 0.0212                         | 0.1095                       | 0.6554  | KAZN            |
| 1   | rs778897343  | G  | C  | -0.0404             | 0.0223            | 2.93E-05 | 0.0048                         | 0.0764                       | 0.8902  | NME7            |
| 1   | rs3737682    | A  | G  | -0.0565             | 0.0292            | 8.06E-06 | -0.0559                        | 0.1087                       | 0.2361  | SLC19A2         |
| 3   | rs34304469   | G  | C  | -0.1004             | 0.0557            | 3.32E-05 | 0.0846                         | 0.1885                       | 0.3008  | FANCD2          |
| 3   | rs141979010  | T  | C  | -0.1047             | 0.0572            | 2.49E-05 | -0.0931                        | 0.2123                       | 0.3124  | ACP3            |
| 3   | rs3792330    | C  | G  | -0.1003             | 0.0567            | 4.55E-05 | -0.1013                        | 0.212                        | 0.2711  | ACP3            |
| 3   | rs1410094297 | G  | A  | 0.0934              | 0.0502            | 1.83E-05 | -0.1201                        | 0.1934                       | 0.1526  | ENSG00000240478 |
| 4   | rs138657647  | G  | A  | 0.0952              | 0.0494            | 9.59E-06 | 0.1007                         | 0.1523                       | 0.1274  | ANK2            |
| 4   | rs147057943  | G  | C  | 0.0803              | 0.0429            | 1.71E-05 | -0.0584                        | 0.15                         | 0.3697  | ARHGAP10        |
| 4   | rs148412038  | G  | T  | -0.1085             | 0.0553            | 6.28E-06 | 0.0204                         | 0.1958                       | 0.8117  | FSTL5           |
| 5   | rs79856437   | G  | T  | -0.0534             | 0.0290            | 2.19E-05 | 0.0346                         | 0.0978                       | 0.4154  | ENSG00000248752 |
| 5   | rs79782138   | A  | G  | -0.0488             | 0.0274            | 4.07E-05 | -0.0489                        | 0.0987                       | 0.2541  | GRAMD2B         |
| 5   | rs144093322  | A  | G  | 0.0630              | 0.0322            | 6.71E-06 | -0.0065                        | 0.1106                       | 0.8928  | LINC01184       |
| 5   | rs1335330583 | G  | A  | 0.0438              | 0.0239            | 2.54E-05 | -0.0438                        | 0.0830                       | 0.2238  | LOC102724404    |
| 7   | rs185093326  | C  | T  | -0.0925             | 0.0510            | 2.94E-05 | -0.0083                        | 0.1753                       | 0.9127  | GRID2IP         |
| 7   | rs189780376  | A  | T  | -0.1076             | 0.0582            | 2.05E-05 | -0.036                         | 0.2148                       | 0.7007  | Unknown         |
| 7   | rs187373518  | A  | G  | -0.1090             | 0.0581            | 1.56E-05 | -0.0364                        | 0.2147                       | 0.6967  | Unknown         |
| 7   | rs185583852  | C  | T  | -0.1090             | 0.0581            | 1.56E-05 | -0.0364                        | 0.2147                       | 0.6967  | Unknown         |
| 9   | rs75760232   | A  | G  | -0.1228             | 0.0655            | 1.56E-05 | -0.2047                        | 0.2703                       | 0.0811  | Unknown         |
| 9   | rs140834132  | G  | C  | -0.1344             | 0.0638            | 1.22E-06 | -0.1967                        | 0.262                        | 0.0838  | Unknown         |
| 9   | rs199788138  | C  | T  | 0.1261              | 0.0676            | 1.75E-05 | -0.0534                        | 0.2344                       | 0.5998  | HACD4           |
| 10  | rs1232162456 | C  | T  | 0.0580              | 0.0328            | 4.42E-05 | -0.0754                        | 0.1135                       | 0.126   | KCNMA1          |
| 10  | rs138051726  | G  | A  | 0.1106              | 0.0625            | 4.53E-05 | 0.0107                         | 0.2018                       | 0.9037  | CYP2C60P        |
| 10  | rs1419006605 | CA | C  | -0.0490             | 0.0268            | 2.55E-05 | 0.0082                         | 0.0920                       | 0.8358  | TDRD1           |
| 11  | rs149974677  | T  | A  | 0.0878              | 0.0487            | 3.35E-05 | 0.0671                         | 0.158                        | 0.328   | Unknown         |
| 12  | rs3751299    | A  | G  | 0.0398              | 0.0222            | 3.89E-05 | -0.0316                        | 0.0753                       | 0.3338  | FBRSL1          |
| 14  | rs1397604872 | G  | C  | -0.1229             | 0.0691            | 4.16E-05 | 0.1222                         | 0.2097                       | 0.1795  | EIF5            |
| 15  | rs117035029  | A  | G  | 0.0959              | 0.0492            | 6.98E-06 | 0.0803                         | 0.1598                       | 0.2484  | SORD            |
| 15  | rs76071295   | A  | G  | 0.0959              | 0.0492            | 6.98E-06 | 0.0803                         | 0.1598                       | 0.2484  | SORD            |
| 15  | rs118153043  | C  | T  | 0.0959              | 0.0492            | 6.98E-06 | 0.0803                         | 0.1598                       | 0.2484  | SORD            |
| 15  | rs139808555  | G  | T  | 0.0959              | 0.0492            | 6.98E-06 | 0.0803                         | 0.1598                       | 0.2484  | SORD            |
| 16  | rs1166633603 | C  | A  | 0.0678              | 0.0376            | 3.28E-05 | 0.0871                         | 0.1192                       | 0.0932  | CDH13           |
| 17  | rs16963856   | A  | G  | 0.0438              | 0.0235            | 1.77E-05 | -0.0123                        | 0.0806                       | 0.7246  | LOC105371740    |
| 17  | rs231475     | G  | A  | 0.0430              | 0.0235            | 2.41E-05 | 0.0354                         | 0.0773                       | 0.2884  | MPP2            |
| 17  | rs75665319   | C  | T  | 0.0523              | 0.0264            | 4.55E-06 | -0.0253                        | 0.0902                       | 0.5181  | SMURF2,         |
| 17  | rs74251270   | T  | C  | 0.0527              | 0.0266            | 5.41E-06 | -0.0177                        | 0.0903                       | 0.6512  | SMURF2          |
| 18  | rs1206393585 | T  | C  | 0.0414              | 0.0204            | 2.73E-06 | 0.0082                         | 0.0696                       | 0.7887  | LAMA1           |
| 18  | rs1341776932 | C  | CT | -0.0302             | 0.0163            | 2.05E-05 | -0.0283                        | 0.0565                       | 0.2491  | MIR4527HG       |
| 19  | rs148415596  | G  | C  | -0.0775             | 0.0430            | 3.29E-05 | -0.052                         | 0.1586                       | 0.4487  | CLASRP          |

|    |             |   |   |         |        |          |         |        |        |        |
|----|-------------|---|---|---------|--------|----------|---------|--------|--------|--------|
| 19 | rs191480708 | T | C | -0.0808 | 0.0427 | 1.29E-05 | -0.0479 | 0.1571 | 0.4828 | CLASRP |
| 22 | rs192599903 | C | T | 0.1326  | 0.0727 | 2.62E-05 | 0.0026  | 0.2393 | 0.9803 | TTC28  |
| 22 | rs116951565 | G | A | -0.0856 | 0.0481 | 4.14E-05 | -0.0727 | 0.1848 | 0.3649 | BPIFC  |

CHR, chromosome; EA, effective allele; NA, non-effective allele; SE, standard errors

A

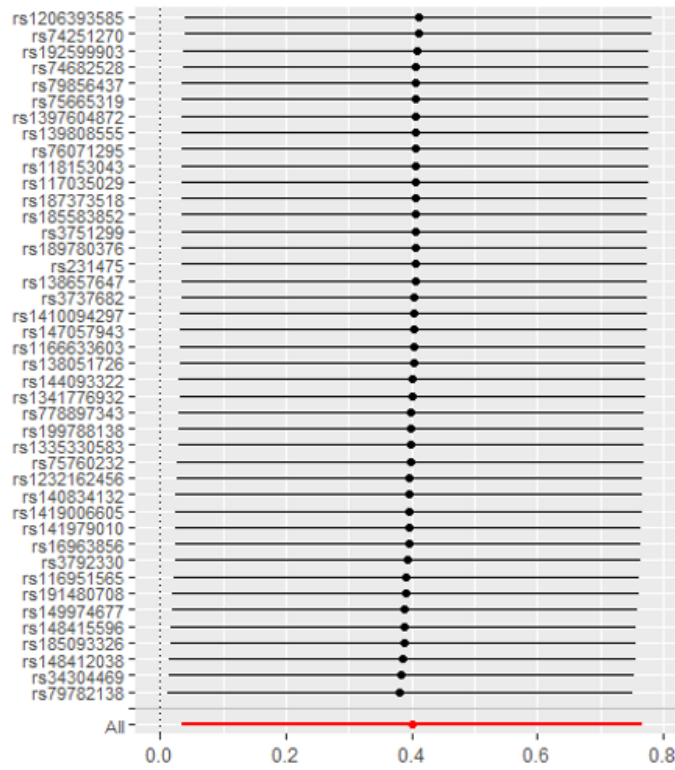

B

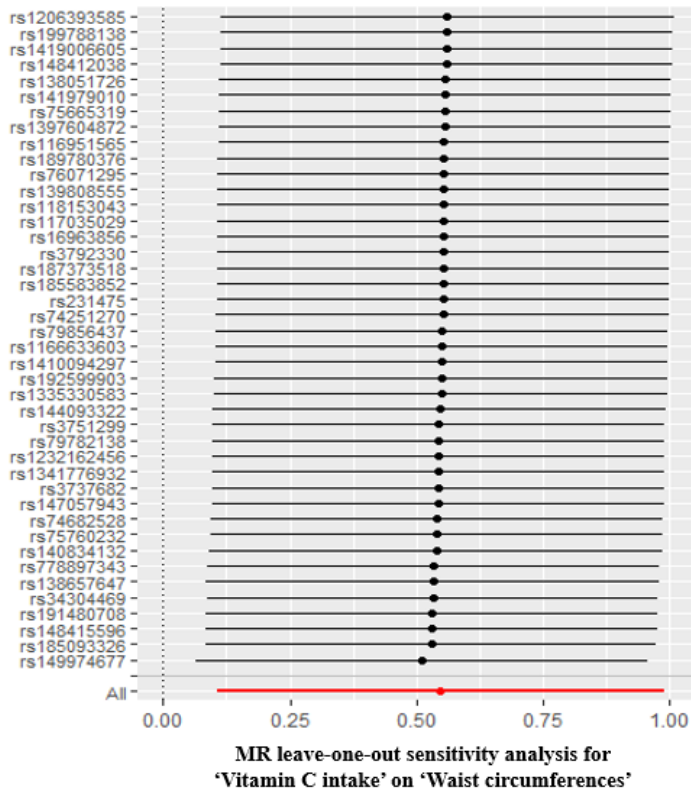

C

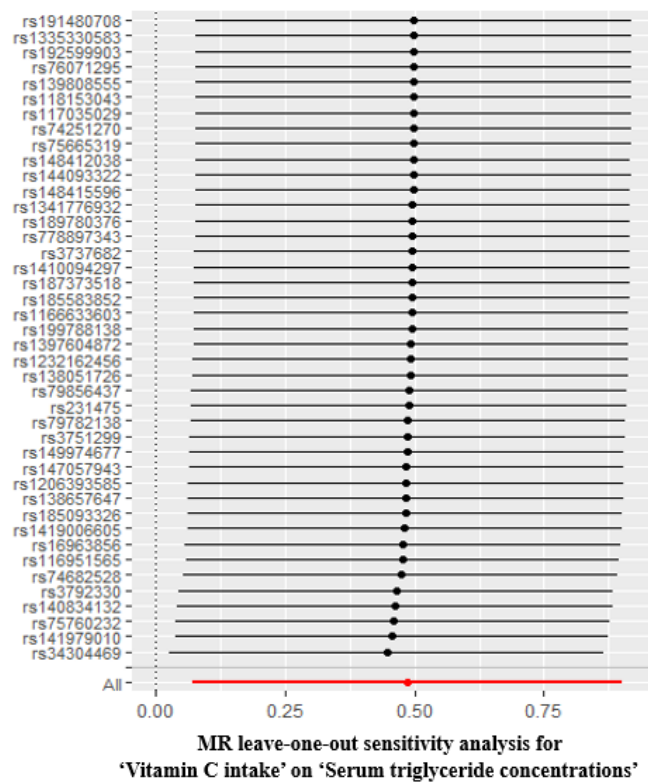

D

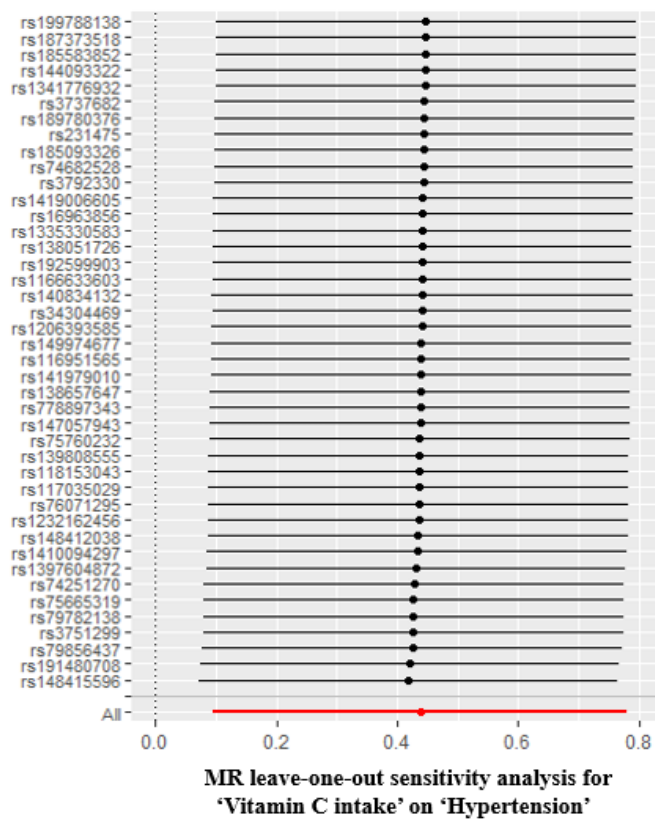

E

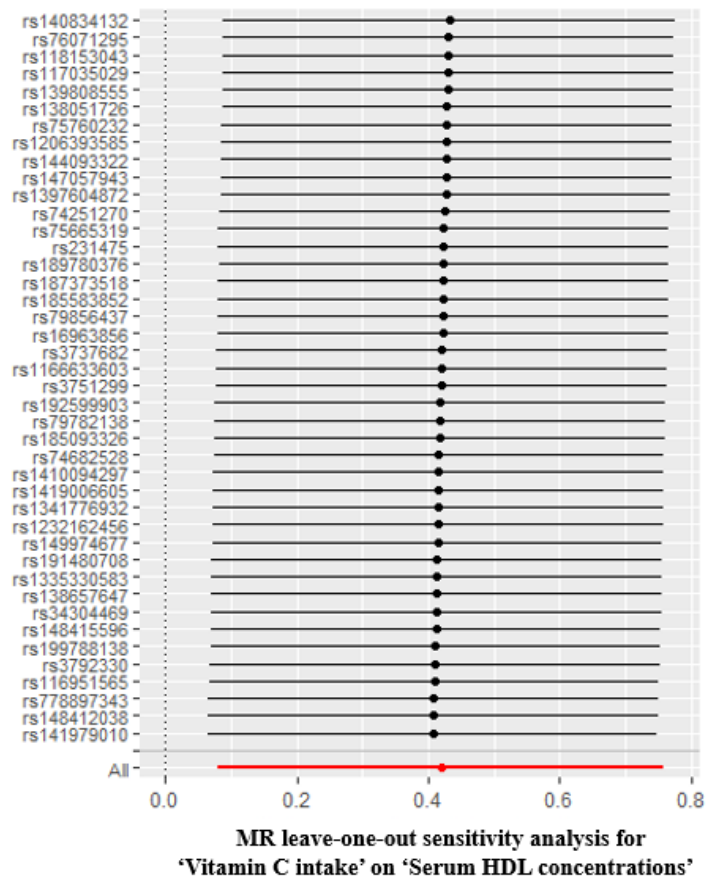

**Supplemental Figure S1.** Leave-one-out sensitivity analysis of MR for the dietary V–C intake on metabolic syndrome and its metabolic traits. A. Metabolic syndrome, B. Waist circumferences, C. serum triglyceride concentrations, D. Hypertension, E. Serum HDL concentrations
